# Supplementary material for: Synthesis and molecular structure of model silica-supported tungsten oxide catalysts for oxidative coupling of methane (OCM)
Source: Royal Society of Chemistry journal article supplement (doi:10.1039/d0cy00289e), 2020-01-01
Supplement: d0cy00289e1.pdf [file d0cy00289e1.pdf]

## Supporting Information

### **Synthesis and Molecular Structure of Model Silica-supported Tungsten oxide Catalysts for Oxidative Coupling of Methane (OCM)**

Daniyal Kiani<sup>†</sup>, Sagar Sourav<sup>†</sup>, Israel E. Wachs\* and Jonas Baltrusaitis\*

Department of Chemical and Biomolecular Engineering, Lehigh University, B336 Iacocca Hall,  
111 Research Drive, Bethlehem, PA 18015, USA

<sup>†</sup> DK and SS contributed equally

Corresponding authors: [iew0@lehigh.edu](mailto:iew0@lehigh.edu), [job314@lehigh.edu](mailto:job314@lehigh.edu)

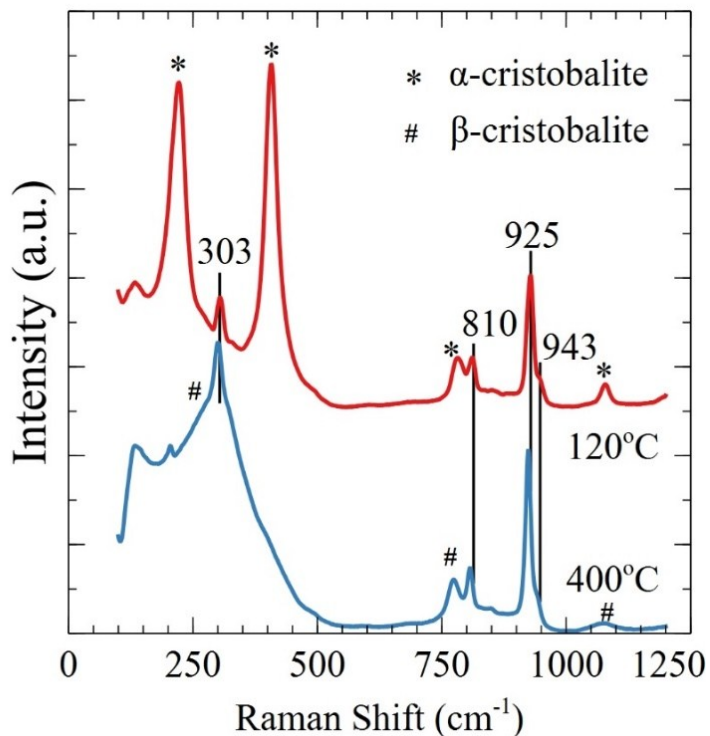

**Figure S1.** *In situ* Raman spectra of the temperature-dependent transformation of crystalline  $\alpha \leftrightarrow \beta$  cristobalite phases of the  $\text{SiO}_2$  support for  $5\% \text{Na}_2\text{WO}_4/\text{SiO}_2$  prepared using the  $\text{Na}_2\text{WO}_4 \cdot 2\text{H}_2\text{O}$  precursor after dehydration at  $400^\circ\text{C}$  under flowing  $10\% \text{O}_2/\text{Ar}$  ( $\sim 30$  cc/min) for 1 hour.

The *in situ* Raman spectra of the supported  $5\% \text{Na}_2\text{WO}_4/\text{SiO}_2$  catalyst prepared using  $\text{Na}_2\text{WO}_4 \cdot 2\text{H}_2\text{O}$  are shown in **Figure S1** at  $120$  and  $400^\circ\text{C}$ . Each spectrum shows vibrations from  $\text{Na}_2\text{WO}_4$  crystalline NPs ( $925$ ,  $810$  and  $303$   $\text{cm}^{-1}$ ) and surface Na-coordinated  $\text{WO}_x$  species ( $943$   $\text{cm}^{-1}$ ). For the  $120^\circ\text{C}$  spectrum, the vibrations marked with “\*” at  $220$ ,  $407$ ,  $780$  and  $1076$   $\text{cm}^{-1}$  are from the crystalline  $\alpha$ -cristobalite phase of  $\text{SiO}_2$  support.<sup>1</sup> This phase has been reported by almost all studies in OCM literature for supported  $\text{Mn-Na}_2\text{WO}_4/\text{SiO}_2$  catalysts.<sup>2,3</sup> Increasing the temperature to  $400^\circ\text{C}$  transforms the crystalline  $\alpha$ -cristobalite phase to the crystalline  $\beta$ -cristobalite phase, with its Raman bands indicated with “#” ( $288$   $\text{cm}^{-1}$  (weak shoulder of  $303$   $\text{cm}^{-1}$  band),  $770$  and  $1074$   $\text{cm}^{-1}$ ).<sup>1</sup> The crystalline  $\alpha \leftrightarrow \beta$  phase transformation of  $\text{SiO}_2$  support was also observed during OCM with *in situ* XRD measurement.<sup>4,5</sup> More importantly, these findings demonstrate that the crystalline  $\alpha$ -cristobalite phase of the  $\text{SiO}_2$  support is not present under OCM catalytic reaction conditions.

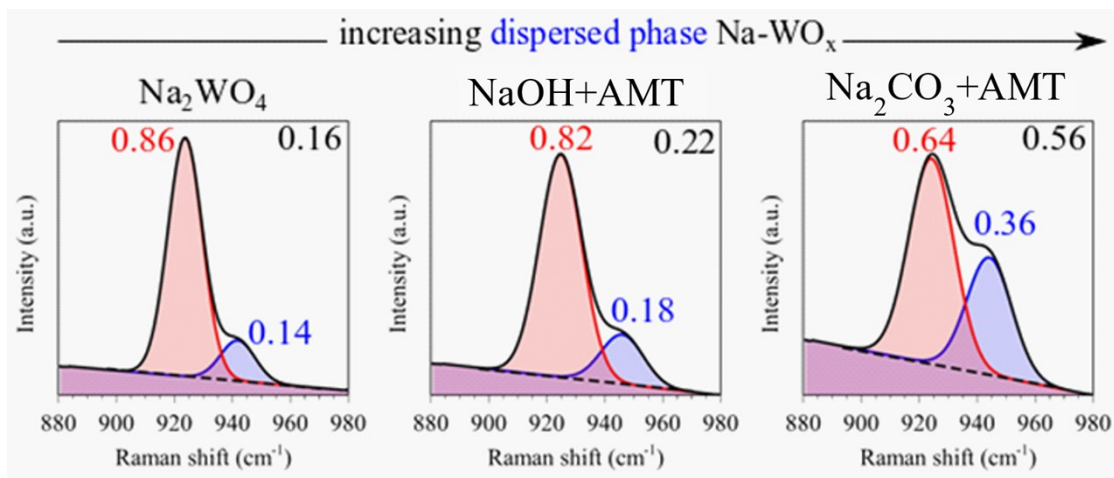

**Figure S2.** Deconvolution of *in situ* Raman spectra yielding the spectral ratio of surface Na-WO<sub>x</sub> sites to the crystalline Na<sub>2</sub>WO<sub>4</sub> phase for the supported 5%Na<sub>2</sub>WO<sub>4</sub>/SiO<sub>2</sub> catalysts prepared using different Na- and W-oxide precursors. The red curve is for the crystalline Na<sub>2</sub>WO<sub>4</sub> NPs, the blue curve is for the surface Na-WO<sub>x</sub> species and the black curve is the original measured *in situ* Raman spectrum. The numeric values indicated in each plot is the percentage of surface of each phase, calculated by finding the area under the respective deconvoluted curves for each catalyst.

**Table S1.** *In situ* UV-Vis DR data of stoichiometric (Na/W=2) Na<sub>2</sub>WO<sub>4</sub>/SiO<sub>2</sub> dehydrated catalysts. The reader is directed to **Figure 3** for a brief analysis of UV-Vis data of the aqueous precursor solutions that corroborate UV-Vis DRS data summarized herein.

| <b>5% Na<sub>2</sub>WO<sub>4</sub>/SiO<sub>2</sub> from different precursors</b> | <b>E<sub>g</sub> (eV)</b> | <b>LMCT (nm)</b> |
|----------------------------------------------------------------------------------|---------------------------|------------------|
| Na <sub>2</sub> WO <sub>4</sub> ·2H <sub>2</sub> O                               | 4.6                       | 214 (s); 257 (w) |
| AMT, NaOH                                                                        | 4.8                       | 214 (s); 257 (m) |
| AMT, Na <sub>2</sub> CO <sub>3</sub>                                             | 4.6                       | 214 (w), 237(s)  |
| AMT, NaNO <sub>3</sub>                                                           | 4.6                       | 240(s)           |

*s= strong, m=moderate and w= weak*

**Table S2.** *In situ* UV-VisDR data of non-stoichiometric (Na/W<2)dehydrated supported Na-WO<sub>x</sub>/SiO<sub>2</sub> catalysts prepared from the AMT+NaOH precursors.

| <b>Na/W ratio (sample composition)</b> | <b>E<sub>g</sub> (eV)</b> | <b>LMCT (nm)</b> |
|----------------------------------------|---------------------------|------------------|
| 0.00 (5WO <sub>x</sub> /0.0 Na)        | 3.9                       | 248              |
| 0.32 (5 WO <sub>x</sub> /0.2 Na)       | 4.1                       | 240              |
| 0.64 (5 WO <sub>x</sub> /0.4 Na)       | 4.3                       | 235              |
| ~1.00 (5 WO <sub>x</sub> /0.8Na)       | 4.5                       | 232              |
| 0.40 (8 WO <sub>x</sub> /0.4Na)        | 4.1                       | 243              |

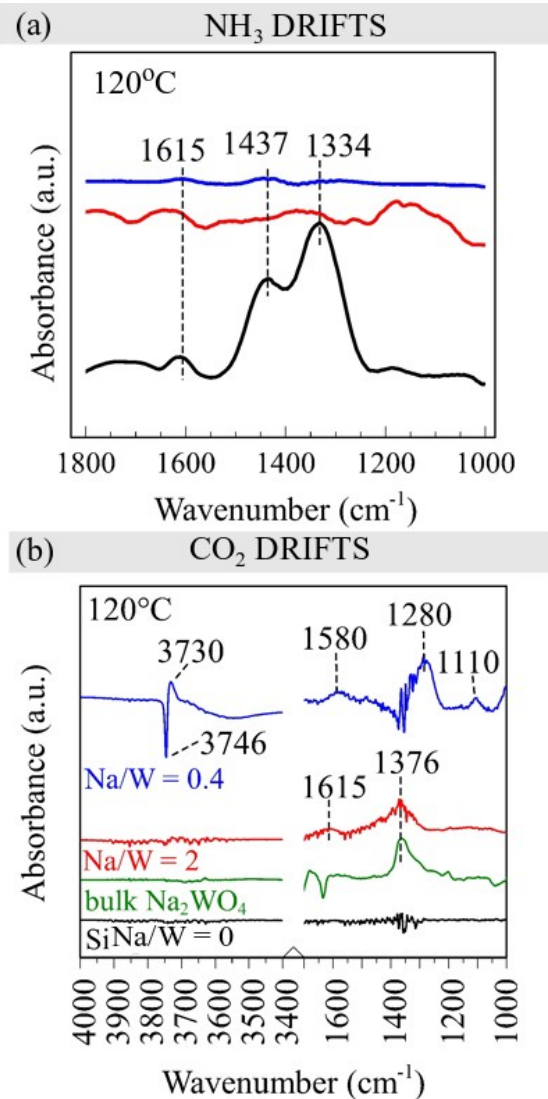

5%WO<sub>x</sub>, 5%Na<sub>2</sub>WO<sub>4</sub> from Na<sub>2</sub>WO<sub>4</sub>·2H<sub>2</sub>O, 8%WO<sub>x</sub>/0.4%Na from AMT+NaOH  
 Na/W=0.0 Na/W=2 Na/W=0.4

**Figure S3.** (a)NH<sub>3</sub>-DRIFT, (b)CO<sub>2</sub>-DRIFT spectra at 120°C, highlighting the absence of acidity in Na-containing samples (red, blue) in (a) and absence of basicity in undoped WO<sub>x</sub>/SiO<sub>2</sub> sample (black) in (b)

**Table S3.** Ratio of the contribution of dispersed Na-WO<sub>x</sub> species to crystalline Na<sub>2</sub>WO<sub>4</sub> phase towards the H<sub>2</sub>-temperature-programmed reduction profiles of various 5%Na<sub>2</sub>WO<sub>4</sub>/SiO<sub>2</sub> catalysts.

| Precursor Used                                     | Na-WO <sub>x</sub> /Na <sub>2</sub> WO <sub>4</sub> contribution ratio |
|----------------------------------------------------|------------------------------------------------------------------------|
| Na <sub>2</sub> WO <sub>4</sub> ·2H <sub>2</sub> O | 1.89                                                                   |
| AMT+NaOH                                           | 1.96                                                                   |
| AMT+Na <sub>2</sub> CO <sub>3</sub>                | 2.68                                                                   |

### References.

- (1) Bates, J. B. Raman Spectra of  $\alpha$ - and  $\beta$ -Cristobalite. *J. Chem. Phys.* **1972**, *57* (9), 4042–4047. <https://doi.org/10.1063/1.1678878>.
- (2) Arndt, S.; Otremba, T.; Simon, U.; Yildiz, M.; Schubert, H.; Schomäcker, R. Mn–Na<sub>2</sub>WO<sub>4</sub>/SiO<sub>2</sub> as Catalyst for the Oxidative Coupling of Methane. What Is Really Known? *Appl. Catal. A Gen.* **2012**, *425–426*, 53–61. <https://doi.org/https://doi.org/10.1016/j.apcata.2012.02.046>.
- (3) Kiani, D.; Sourav, S.; Baltrusaitis, J.; Wachs, I. E. Oxidative Coupling of Methane (OCM) by SiO<sub>2</sub>-Supported Tungsten Oxide Catalysts Promoted with Mn and Na. *ACS Catal.* **2019**, *9* (7), 5912–5928. <https://doi.org/10.1021/acscatal.9b01585>.
- (4) Hou, S.; Cao, Y.; Xiong, W.; Liu, H.; Kou, Y. Site Requirements for the Oxidative Coupling of Methane on SiO<sub>2</sub>-Supported Mn Catalysts. *Ind. Eng. Chem. Res.* **2006**, *45* (21), 7077–7083. <https://doi.org/10.1021/ie060269c>.
- (5) Vamvakeros, A.; Jacques, S. D. M.; Middelkoop, V.; Di Michiel, M.; Egan, C. K.; Ismagilov, I. Z.; Vaughan, G. B. M.; Gallucci, F.; van Sint Annaland, M.; Shearing, P. R. Real Time Chemical Imaging of a Working Catalytic Membrane Reactor during Oxidative Coupling of Methane. *Chem. Commun.* **2015**, *51* (64), 12752–12755.
- (6) Baes, C. F.; Mesmer, R. E. *The Hydrolysis of Cations*. Wiley: New York 1976.
- (7) Ostromecki, M. M.; Burcham, L. J.; Wachs, I. E.; Ramani, N.; Ekerdt, J. G. The Influence of Metal Oxide Additives on the Molecular Structures of Surface Tungsten Oxide Species on Alumina: I. Ambient Conditions. *J. Mol. Catal. A Chem.* **1998**, *132* (1), 43–57. [https://doi.org/https://doi.org/10.1016/S1381-1169\(97\)00226-4](https://doi.org/https://doi.org/10.1016/S1381-1169(97)00226-4).
- (8) Waterland, M. R.; Stockwell, D.; Kelley, A. M. Symmetry Breaking Effects in NO<sub>3</sub><sup>–</sup>: Raman Spectra of Nitrate Salts and Ab Initio Resonance Raman Spectra of Nitrate–Water Complexes. *J. Chem. Phys.* **2001**, *114* (14), 6249–6258. <https://doi.org/10.1063/1.1355657>.
